# Supplementary material for: Tacticity control approached by visible-light induced organocobalt-mediated radical polymerization: the synthesis of crystalline poly(N,N-dimethylacrylamide) with high isotacticity
Source: Royal Society of Chemistry journal article supplement (doi:10.1039/d0py00587h), 2020-01-01
Supplement: d0py00587h1.pdf [file d0py00587h1.pdf]

# Tacticity Control Approached by Visible-Light Induced Organocobalt-Mediated Radical Polymerization: the Synthesis of Crystalline Poly(*N,N*-dimethylacrylamide) with High Isotacticity

Zhenqiang Wu,<sup>a</sup> Chi-How Peng<sup>\*b</sup> and Xuefeng Fu<sup>\*a</sup>

<sup>a</sup> Beijing National Laboratory for Molecular Sciences, State Key Lab of Rare Earth Materials Chemistry and Applications, College of Chemistry and Molecular Engineering, Peking University, Beijing 100871, China

<sup>b</sup> Department of Chemistry and Frontier Research Center on Fundamental and Applied Sciences of Matters, National Tsing Hua University, Hsinchu 30013, Taiwan

## Contents:

1. General experimental section
2. Single crystal X-ray diffraction data of (TMP-OH)CoCO<sub>2</sub>CH<sub>3</sub> (**IV**)
3. Visible-light induced stereospecific polymerization of DMA
4. <sup>1</sup>H NMR spectra of isotactic homopolymers
5. Kinetic study of visible-light induced polymerization of DMA
6. GPC traces of stereoblock copolymers
7. TGA analysis of PDMA
8. DSC analysis of stereoblock copolymers
9. DSC analysis of isotactic homopolymers
10. PXRD plots of isotactic homopolymers
11. <sup>1</sup>H NMR spectra of ligands and organocobalt complexes

## 1 General experimental section

### Materials

*N,N*-dimethylacrylamide (DMA, Alfa Aesar) was distilled under reduced pressure and stored in the refrigerator before use. (salen)Co<sup>II</sup> ((salen)H<sub>2</sub> = (*R,R*)-(-)-*N,N'*-bis(3,5-di-*tert*-butylsalicylidene)-1,2-cyclohexanediamine, Aldrich), potassium peroxymonosulfate (Oxone®, Alfa Aesar), aluminum triflate (Al(OTf)<sub>3</sub>, Alfa Aesar), scandium triflate (Sc(OTf)<sub>3</sub>, Aldrich), lutetium triflate (Lu(OTf)<sub>3</sub>, Energy), yttrium triflate (Y(OTf)<sub>3</sub>, TCI), lanthanum triflate (La(OTf)<sub>3</sub>, TCI), benzene (99.8%, Alfa Aesar), and methanol (99.9%, J&K) were used as received. CDCl<sub>3</sub>, DMSO-*d*<sub>6</sub> and CD<sub>3</sub>OD were purchased from Cambridge Isotope Laboratory Inc.. Spectra/Por(R) dialysis membrane was purchased from Sangon Biotech (Shanghai) Ltd.. All other chemicals were purchased from Alfa Aesar, Aldrich, TCI or J&K Scientific Ltd. and used as received unless otherwise noted.

### Light source

A 500 W xenon lamp (CEL-S500, Aulight, Beijing, China) was used as the light source with a 420~780 nm filter to give the visible-light. The intensity of visible-light irradiation was modulated by employing neutral density filters, and measured by a FZ-A radiometer (Photoelectric Instrument Factory of Beijing Normal University) equipped with a 400~1000 nm sensor.

## Characterization

**NMR spectroscopy and ESI-MS.**  $^1\text{H}$  NMR spectra were recorded on a Bruker 400 MHz FT spectrometer at ambient temperature in  $\text{CDCl}_3$ ,  $\text{DMSO}-d_6$  or  $\text{CD}_3\text{OD}$ . Electrospray ionization-mass spectrometry (ESI-MS) results were obtained by a Bruker Apex IV FTMS spectrometer.

**Single-crystal X-ray diffraction analysis.** The single-crystal X-ray diffraction data of complex  $(\text{TMP}-\text{OH})\text{CoCO}_2\text{CH}_3$  (**IV**) was collected on a Rigaku XtaLAB PRO 007HF(Mo) single crystal X-ray diffractometer.

**GPC measurement.** The gel permeation chromatography (GPC) in DMF was performed in an Agilent 1200 series system, equipped with two Agilent PolarGel-M columns ( $300 \times 7.5$  mm), an Iso Pump (G1310A), a UV detector, and a differential refractive index detector (RID). The number-average molecular weight ( $M_n$ ), weight-average molecular weight ( $M_w$ ), and PDI were measured at  $50^\circ\text{C}$  with a flow rate of  $1.0\text{ mL min}^{-1}$ . A series of poly(methyl methacrylate)s (molecular weight range of 2710-298900  $\text{g mol}^{-1}$ , from Polymer Laboratories) was used as standards for calibration.

GPC in chloroform was also performed in an Agilent 1200 series system, equipped with three Agilent PLGel columns (pore diameters were  $10^5$ ,  $10^4$ , and  $10^3$  Å, respectively), as well as the same pump and detectors mentioned above.  $M_n$ ,  $M_w$ , and PDI were measured at  $35^\circ\text{C}$  with a flow rate of  $1.0\text{ mL min}^{-1}$ . The same series of poly(methyl methacrylate)s was used as standards for calibration.

**TGA measurement.** The thermogravimetric analysis (TGA) measurement was carried out with a TA Q600 SDT thermal analyzer. The polymer powder (about 4 mg) was weighed into an alumina pan, and placed in the oven of TGA instrument. The sample was heated to  $800^\circ\text{C}$  from room temperature, at a heating rate of  $10^\circ\text{C min}^{-1}$  under the nitrogen or air atmosphere.

**DSC measurement.** The differential scanning calorimetry (DSC) measurement was carried out with a TA Q100 or TA Q2000 thermal analyzer. The polymer powder (about 2 mg) was weighed into an aluminum, sealed pan, and placed in the oven of DSC instrument. Then, dynamic scans were performed within a temperature range of  $-20$  to  $300^\circ\text{C}$  at heating and cooling rates of  $5^\circ\text{C min}^{-1}$  under the nitrogen atmosphere. Any thermal history difference in the polymer was eliminated by the first cycle: cooling from room temperature to  $-20^\circ\text{C}$ , then heating to  $300^\circ\text{C}$ . And, the thermal properties were recorded during the second cycle: cooling from  $300^\circ\text{C}$  to  $-20^\circ\text{C}$ , then heating to  $300^\circ\text{C}$ .

**PXRD measurement.** The powder X-ray diffraction (PXRD) data of polymer before annealing were directly collected on a Philips X Pert Pro diffractometer with  $\text{Cu K}\alpha$  radiation ( $\lambda = 1.5418$  Å) over the  $2\theta$  range of  $5$ - $30^\circ$  at room temperature. Then, the polymer powders were annealed under air atmosphere at a specific temperature for about 80 h, and measured at room temperature to obtain the PXRD data of polymer after annealing.

## Synthesis procedures for cobalt complexes

Organocobalt complexes  $(\text{salen})\text{CoCO}_2\text{CH}_3$  (**I**)<sup>1</sup> and  $(\text{TMP})\text{CoCO}_2\text{CH}_3$  (**II**,  $(\text{TMP})\text{H}_2 = 5,10,15,20$ -tetramesitylporphyrin),<sup>2</sup> as well as porphyrins  $(\text{TDMAP})\text{H}_2$  ( $5,10,15,20$ -tetrakis(2,6-dimethyl-4-methoxyphenyl)porphyrin)<sup>3,4</sup> and  $(\text{TMP}-\text{OH})\text{H}_2$  ( $5$ -(4-hydroxyphenyl)- $10,15,20$ -trimesitylporphyrin)<sup>5</sup> were prepared following the previously reported methods.

**Synthesis of  $(\text{TDMAP})\text{Co}^{\text{II}}$ .**  $(\text{TDMAP})\text{H}_2$  (0.10 mmol, 86 mg) and cobalt acetate tetrahydrate (0.61 mmol, 151 mg) were dispersed in 9.0 mL DMF. The mixture was stirred under the nitrogen atmosphere for 24 h at  $140^\circ\text{C}$ , then cooled to room temperature. After removing solvent under

vacuum, the crude product was dissolved in chloroform, and purified by water extraction (yield = 93%).  $^1\text{H}$  NMR ( $\text{CDCl}_3$ , 400 MHz),  $\delta$  (ppm): 15.24(br, 8H, pyrrole-*H*), 8.94(s, 8H, *m*-phenyl-*H*), 5.14(s, 12H,  $-\text{OCH}_3$ ), 3.51(br, 24H,  $-\text{CH}_3$ ). ESI-MS  $m/z$  calculated for  $[\text{C}_{56}\text{H}_{52}\text{CoN}_4\text{O}_4]^+$ : 903.331503, found: 903.330718.

**Synthesis of (TMP-OH)Co<sup>II</sup>.** (TMP-OH) $\text{H}_2$  (0.10 mmol, 77 mg) and cobalt acetate tetrahydrate (0.20 mmol, 51 mg) were dispersed in 8.0 mL DMF. The mixture was stirred under the nitrogen atmosphere for 5 h at 160 °C, then cooled to room temperature. After removing solvent under vacuum, the crude product was dissolved in chloroform, and purified by water extraction (yield = 99%).  $^1\text{H}$  NMR ( $\text{CDCl}_3$ , 400 MHz),  $\delta$  (ppm): 16.0-14.8(br, 8H, pyrrole-*H*), 12.39(br, 2H, *o*-phenyl-*H*), 9.28(s, 4H, *m*-phenyl-*H*), 9.15(s, 4H, *m*-phenyl-*H*), 6.53(br, 1H,  $-\text{OH}$ ), 3.99(s, 6H, *p*- $\text{CH}_3$ ), 3.91(s, 3H, *p*- $\text{CH}_3$ ), 3.55(br, 12H, *o*- $\text{CH}_3$ ), 3.26(br, 6H, *o*- $\text{CH}_3$ ). ESI-MS  $m/z$  calculated for  $[\text{C}_{53}\text{H}_{46}\text{CoN}_4\text{O}]^+$ : 813.299809, found: 813.297350.

**Synthesis of (TDMAP)CoCO<sub>2</sub>CH<sub>3</sub> (III).** A 6.0 mL toluene solution of (TDMAP)Co<sup>II</sup> (0.023 mmol, 19 mg), Oxone® (0.10 mmol, 32 mg),  $\text{Na}_2\text{HPO}_4$  (0.42 mmol, 59 mg), and methanol (0.40 mL) was degassed by three freeze-pump-thaw cycles and refilled with CO (1 atm), then stirred for 13 h under dark at room temperature. The crude product was purified by column chromatography (basic alumina, mixture of petroleum ether and  $\text{CH}_2\text{Cl}_2$  (3:1, *v/v*) as eluent) after removing the solvent (yield = 42%).  $^1\text{H}$  NMR ( $\text{CDCl}_3$ , 400 MHz),  $\delta$  (ppm): 8.67(s, 8H, pyrrole-*H*), 7.01(d, 4H,  $J$  = 2.3 Hz, *m*-phenyl-*H*), 6.95(d, 4H,  $J$  = 2.4 Hz, *m*-phenyl-*H*), 4.04(s, 12H,  $-\text{OCH}_3$ ), 2.03(s, 12H,  $-\text{CH}_3$ ), 1.67(s, 12H,  $-\text{CH}_3$ ), 1.13(s, 3H,  $\text{COOCH}_3$ ). ESI-MS  $m/z$  calculated for  $[\text{C}_{58}\text{H}_{55}\text{CoN}_4\text{O}_6]^+$ : 962.344807, found: 962.346346.

**Synthesis of (TMP-OH)CoCO<sub>2</sub>CH<sub>3</sub> (IV).** A 19.0 mL toluene solution of (TMP-OH)Co<sup>II</sup> (0.082 mmol, 67 mg), Oxone® (0.41 mmol, 125 mg),  $\text{Na}_2\text{HPO}_4$  (1.63 mmol, 232 mg), and methanol (1.20 mL) was degassed by three freeze-pump-thaw cycles and refilled with CO (1 atm), then stirred for 7 h under dark at room temperature. The crude product was purified by column chromatography (basic alumina, gradient mixture of  $\text{CH}_2\text{Cl}_2$  and  $\text{CH}_3\text{OH}$  (from 50:1 to 5:1, *v/v*) as eluent) after removing the solvent (yield = 47%). Recrystallization using diffusion process of  $\text{CH}_2\text{Cl}_2/n$ -hexane gave dark red crystal suitable for single-crystal X-ray diffraction analysis.  $^1\text{H}$  NMR ( $\text{CDCl}_3$ , 400 MHz),  $\delta$  (ppm): 8.84(d, 2H,  $J$  = 4.8 Hz, pyrrole-*H*), 8.70(d, 2H,  $J$  = 4.9 Hz, pyrrole-*H*), 8.66(q, 4H,  $J$  = 4.8 Hz, pyrrole-*H*), 8.00(d, 2H,  $J$  = 7.8 Hz, phenyl-*H*), 5.02(s, 1H,  $-\text{OH}$ ), 2.60(d, 9H, *p*- $\text{CH}_3$ ), 2.04(s, 3H, *o*- $\text{CH}_3$ ), 1.95(s, 6H, *o*- $\text{CH}_3$ ), 1.74(s, 6H, *o*- $\text{CH}_3$ ), 1.59(s, 3H, *o*- $\text{CH}_3$ ), 1.16(s, 3H,  $-\text{COOCH}_3$ ). ESI-MS  $m/z$  calculated for  $[\text{C}_{55}\text{H}_{49}\text{CoN}_4\text{O}_3]^+$ : 872.313113, found: 872.315147.

**Synthesis of (TMP-OH)Co-*a*PDMA<sub>n</sub> (V<sub>n</sub>).** A certain amount of (TMP-OH)CoCO<sub>2</sub>CH<sub>3</sub> (IV) and DMA were mixed in  $\text{C}_6\text{H}_6$  in a Schlenk flask. After three freeze-pump-thaw cycles, the flask was refilled with nitrogen, then placed in a water bath with room temperature and irradiated by 500 W Xe lamp with a 420~780 nm filter for about 12 h. The DMA conversion and tacticity of polymer were determined by  $^1\text{H}$  NMR spectra in  $\text{DMSO}-d_6$ , then  $M_{n,\text{GPC}}$  and PDI were determined using GPC analysis in DMF. After removing DMA and solvent under vacuum, the organocobalt complex (TMP-OH)Co-*a*PDMA<sub>n</sub> (V<sub>n</sub>) was stored under nitrogen atmosphere in the refrigerator before use.

### Typical procedure for visible-light induced stereospecific polymerization.

A certain amount of organocobalt complex V<sub>n</sub> (or other complexes), DMA and Lewis acids were dissolved in the mixed solvent of methanol and benzene (1:1, *v/v*) in a Schlenk flask. After three freeze-pump-thaw cycles, the flask was refilled with nitrogen, then placed in a water bath with room

temperature (or cold bath with specific temperature) and irradiated by 500 W Xe lamp with a 420~780 nm filter for a specified period of time. The polymer powder was precipitated by adding diethyl ether with ten times volume into the solution, purified by dialysis in water, and then freeze dried on CHRIST Alpha 1-2 LDplus freeze drier for further characterization. The DMA conversion and tacticity of polymer were determined by  $^1\text{H}$  NMR spectra in  $\text{DMSO}-d_6$  and  $\text{CD}_3\text{OD}$ . After dissolving polymers in DMF or chloroform,  $M_{n,\text{GPC}}$  and PDI were determined using GPC analysis. The glass transition temperature ( $T_g$ ), crystallization temperature ( $T_c$ ) and melting temperature ( $T_m$ ) of polymer were measured using DSC analysis.

## 2 Single crystal X-ray diffraction data of (TMP-OH)CoCO<sub>2</sub>CH<sub>3</sub> (IV)

**Table S1** Crystal data and structure refinement for complex **IV**

|                                   |                                                                                                                      |
|-----------------------------------|----------------------------------------------------------------------------------------------------------------------|
| Deposition number                 | 1972804                                                                                                              |
| Empirical formula                 | C <sub>55</sub> H <sub>49</sub> Co N <sub>4</sub> O <sub>3</sub>                                                     |
| Formula weight                    | 872.91 g/mol                                                                                                         |
| Temperature                       | 179.98 K                                                                                                             |
| Wavelength                        | 0.71073 Å                                                                                                            |
| Crystal system                    | trigonal                                                                                                             |
| Space group                       | P -3 c 1                                                                                                             |
| Unit cell dimensions              | a = 26.2516(5) Å $\alpha = 90^\circ$<br>b = 26.2516(5) Å $\beta = 90^\circ$<br>c = 26.8975(8) Å $\gamma = 120^\circ$ |
| Volume                            | 16052.9(8) Å <sup>3</sup>                                                                                            |
| Z                                 | 12                                                                                                                   |
| Density (calculated)              | 1.08348 g/cm <sup>3</sup>                                                                                            |
| Absorption coefficient            | 0.362 mm <sup>-1</sup>                                                                                               |
| F(000)                            | 5496.0                                                                                                               |
| Crystal size                      | 0.20 × 0.15 × 0.05 mm <sup>3</sup>                                                                                   |
| Theta range for data collection   | 1.759 to 25.026°                                                                                                     |
| Index ranges                      | -25 ≤ h ≤ 31,    -30 ≤ k ≤ 30,    -32 ≤ l ≤ 32                                                                       |
| Reflections collected             | 51398                                                                                                                |
| Independent reflections           | 9464 [R(int) = 0.0427]                                                                                               |
| Completeness to theta = 25.026°   | 99.9%                                                                                                                |
| Absorption correction             | Symmetry-related measurements                                                                                        |
| Max. and min. transmission        | 1.00000 and 0.82910                                                                                                  |
| Refinement method                 | Full-matrix least-squares on F <sup>2</sup>                                                                          |
| Data / restraints / parameters    | 9464 / 0 / 579                                                                                                       |
| Goodness-of-fit on F <sup>2</sup> | 1.025                                                                                                                |
| Final R indices [I > 2σ(I)]       | R1 = 0.0520, wR2 = 0.1205                                                                                            |
| R indices (all data)              | R1 = 0.0872, wR2 = 0.1390                                                                                            |
| Extinction coefficient            | n/a                                                                                                                  |
| Largest diff. peak and hole       | 0.608 and -0.587 e.Å <sup>-3</sup>                                                                                   |

Single crystal of (TMP-OH)CoCO<sub>2</sub>CH<sub>3</sub> (**IV**) suitable for X-ray diffraction analysis were obtained by recrystallization from CH<sub>2</sub>Cl<sub>2</sub> solution. The structure of complex **IV** is shown in Fig. S1. The cobalt atom is almost located in the porphyrin plane and has a five-coordinated, square pyramidal geometry. The Co–N bond lengths at the range of 1.945 to 1.957 Å were similar to those found in the analogue cobalt-vinyl porphyrin complex (1.941 to 1.975 Å).<sup>6</sup> The Co–C bond length was 1.882 Å, which was similar with that of (salen)CoCO<sub>2</sub>CH<sub>3</sub> (1.863 Å) reported previously.<sup>1</sup> The deposition number of CCDC is 1972804 for complex **IV**.

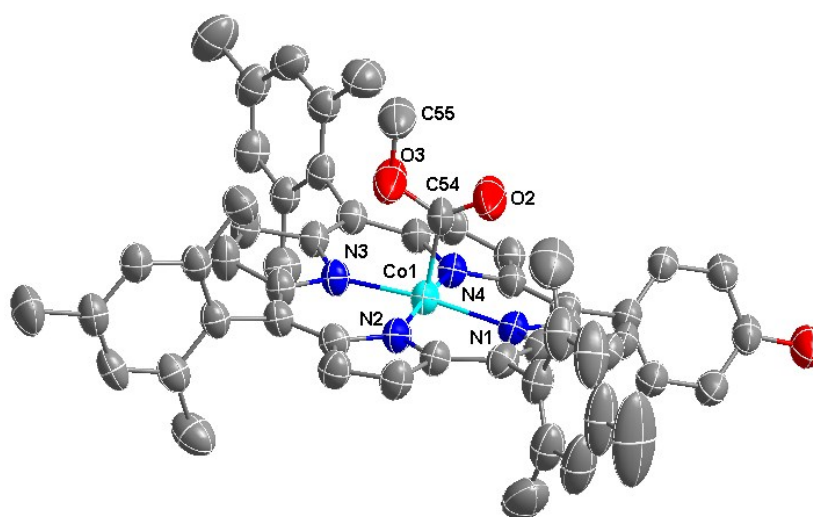

**Fig. S1** Solid state structure of organocobalt complex (TMP-OH)CoCO<sub>2</sub>CH<sub>3</sub> (**IV**) shown with 50% thermal ellipsoids. *n*-hexane and H atoms are omitted for clarity. Selected bond lengths (Å) and angles (°): Co1-N1 1.954(2), Co1-N2 1.949(2), Co1-N3 1.945(2), Co1-N4 1.957(2), Co1-C54 1.882(3), N1-Co1-N2 89.29(9), N2-Co1-N3 90.49(9), N3-Co1-N4 89.50(9), N4-Co1-N1 89.80(9), C54-Co1-N1 92.92(11), O2-C54-Co1 125.6(3), O3-C54-Co1 115.1(2)

### 3 Visible-light induced stereospecific polymerization of DMA

**Table S2** Visible-light induced polymerization of DMA mediated by organocobalt complexes in polar solvents<sup>a</sup>

| Entry          | Cobalt mediator | [DMA] <sub>0</sub> /[Co] <sub>0</sub> | Time (h) | Conv. <sup>b</sup> (%) | <i>M</i> <sub>n,th</sub> <sup>c</sup> (g mol <sup>-1</sup> ) | <i>M</i> <sub>n,GPC</sub> <sup>d</sup> (g mol <sup>-1</sup> ) | <i>M</i> <sub>w</sub> / <i>M</i> <sub>n</sub> <sup>d</sup> | <i>m</i> <sup>b</sup> (%) |
|----------------|-----------------|---------------------------------------|----------|------------------------|--------------------------------------------------------------|---------------------------------------------------------------|------------------------------------------------------------|---------------------------|
| 1              | <b>I</b>        | 600:1                                 | 10.1     | 58                     | 35200                                                        | 30400                                                         | 1.47                                                       | 49                        |
| 2              | <b>II</b>       | 600:1                                 | 20.3     | 90                     | 54400                                                        | 48000                                                         | 1.44                                                       | 50                        |
| 3              | <b>III</b>      | 600:1                                 | 18.0     | 74                     | 45000                                                        | 39400                                                         | 1.42                                                       | 52                        |
| 4 <sup>e</sup> | <b>IV</b>       | 600:1                                 | 95.0     | 45                     | 27600                                                        | 26600                                                         | 1.15                                                       | 49                        |

<sup>a</sup> The concentration of DMA was 1.0 mol L<sup>-1</sup>, solvent was mixture of methanol and benzene (1:1, v/v), using 500 W xenon lamp with filter of 420~780 nm, light intensity was 3 mW cm<sup>-2</sup>, reaction temperature was around 25 °C. <sup>b</sup> Determined based on <sup>1</sup>H NMR spectra. <sup>c</sup> *M*<sub>n,th</sub> = *M*<sub>w(Mediator)</sub> + *M*<sub>w(DMA)</sub> × [DMA]<sub>0</sub>/[Co]<sub>0</sub> × Conv.(DMA). <sup>d</sup> Determined using gel permeation chromatography (GPC) in DMF calibrated against the poly(methyl methacrylate) (PMMA) standard. <sup>e</sup> The solvent was methanol.

**Table S3** Visible-light induced stereospecific polymerization of DMA mediated by organocobalt complexes<sup>a</sup>

| Entry          | Lewis acid           | Cobalt mediator <sup>b</sup> | [DMA] <sub>0</sub> /[Co] <sub>0</sub><br>/[LA] <sub>0</sub> | Time (h) | Conv. <sup>c</sup> (%) | $M_{n,th}^d$<br>(g mol <sup>-1</sup> ) | $M_{n,GPC}^e$<br>(g mol <sup>-1</sup> ) | $M_w/M_n^e$       | $m^c$ (%) | $m_2^f$ (%) | $mm^c$ (%) | $mm_2^f$ (%) |
|----------------|----------------------|------------------------------|-------------------------------------------------------------|----------|------------------------|----------------------------------------|-----------------------------------------|-------------------|-----------|-------------|------------|--------------|
| 1              | Al(OTf) <sub>3</sub> | <b>IV</b>                    | 600:1:10                                                    | 115.6    | 29                     | 18100                                  | 26400                                   | 1.44              | 50        | -           | -          | -            |
| 2              | Sc(OTf) <sub>3</sub> | <b>V<sub>34</sub></b>        | 600:1:20                                                    | 69.4     | 85                     | 54800                                  | 53500                                   | 1.47              | 70        | 71          | 47         | 48           |
| 3              | Lu(OTf) <sub>3</sub> | <b>V<sub>50</sub></b>        | 600:1:20                                                    | 15.2     | 68                     | 46300                                  | 50100                                   | 1.28              | 81        | 85          | 68         | 73           |
| 4              | Y(OTf) <sub>3</sub>  | <b>V<sub>50</sub></b>        | 600:1:20                                                    | 7.3      | 58                     | 40300                                  | 45200                                   | 1.26              | 81        | 86          | 67         | 73           |
| 5 <sup>h</sup> | La(OTf) <sub>3</sub> | <b>V<sub>48</sub></b>        | 600:1:20                                                    | 8.0      | 63                     | 43100                                  | 62000 <sup>g</sup>                      | 1.19 <sup>g</sup> | 85        | 90          | 75         | 81           |

<sup>a</sup> The concentration of DMA was 1.0 mol L<sup>-1</sup>, solvent was mixture of methanol and benzene (1:1, v/v), using 500 W xenon lamp with filter of 420~780 nm, light intensity was 3 mW cm<sup>-2</sup>, reaction temperature was around 25 °C. <sup>b</sup> **V<sub>34</sub>**:  $M_{n,GPC}$  = 5500,  $M_w/M_n$  = 1.22,  $m$  = 50%. **V<sub>50</sub>**:  $M_{n,GPC}$  = 6800,  $M_w/M_n$  = 1.21,  $m$  = 50%. **V<sub>48</sub>**:  $M_{n,GPC}$  = 6700,  $M_w/M_n$  = 1.28,  $m$  = 50%. <sup>c</sup> Determined based on <sup>1</sup>H NMR spectra. <sup>d</sup>  $M_{n,th} = M_{w(Mediator)} + M_{w(DMA)} \times [DMA]_0/[Co]_0 \times \text{Conv.}(DMA)$ . <sup>e</sup> Determined using GPC in DMF calibrated against the PMMA standard. <sup>f</sup>  $m_2 = [(m \times DP) - (m_1 \times DP_1)]/DP_2$ , and  $mm_2 = [(mm \times DP) - (mm_1 \times DP_1)]/DP_2$ , where  $DP_1$  was determined by complex **V<sub>n</sub>**,  $DP_2 = [DMA]_0/[Co]_0 \times \text{Conv.}$ , and  $DP = DP_1 + DP_2$ . <sup>g</sup> Determined using GPC in CHCl<sub>3</sub> calibrated against the PMMA standard. <sup>h</sup> Reaction temperature was -10 °C.

#### 4 <sup>1</sup>H NMR spectra of isotactic homopolymers

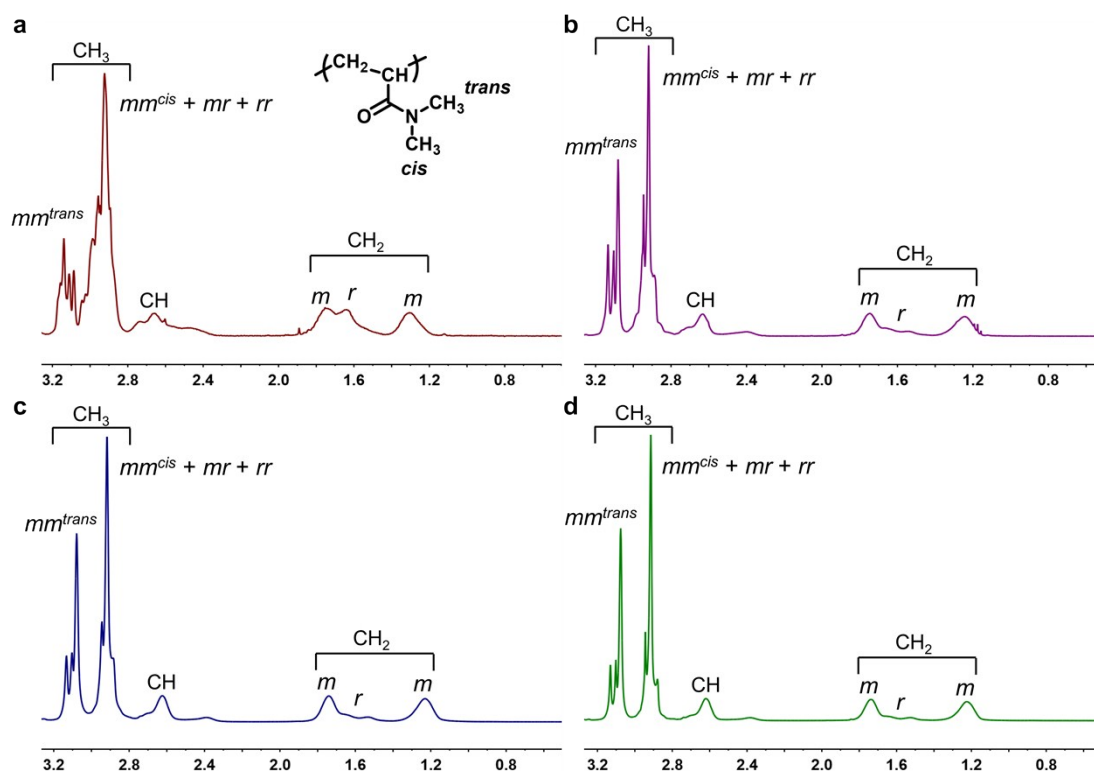

**Fig. S2** <sup>1</sup>H NMR spectra (400 MHz, CD<sub>3</sub>OD) of PDMA homopolymers synthesized by visible-light induced radical polymerization mediated by complex **IV** at ambient temperature. **a**) [Sc(OTf)<sub>3</sub>]<sub>0</sub>/[DMA]<sub>0</sub> = 10:600. **b**) [La(OTf)<sub>3</sub>]<sub>0</sub>/[DMA]<sub>0</sub> = 10:600. **c**) [La(OTf)<sub>3</sub>]<sub>0</sub>/[DMA]<sub>0</sub> = 40:600. **d**) [La(OTf)<sub>3</sub>]<sub>0</sub>/[DMA]<sub>0</sub> = 80:600.

## 5 Kinetic study of visible-light induced polymerization of DMA

The linear first order kinetic plots of the visible-light induced stereospecific radical polymerizations mediated by complex **V**<sub>46</sub> were observed in the presence of various Lewis acids (Fig. S3). Since the organocobalt(III) species was directly used to mediate the DMA polymerization, no induction period was observed.<sup>1,2</sup> The slopes of the kinetic plots, which represent the polymerization rates, were significantly affected by the Lewis acids. In the absence of Lewis acid, the polymerization showed the slowest rate with the apparent rate constant ( $k_{app}$ ) as  $(0.39 \pm 0.01) \times 10^{-3} \text{ min}^{-1}$ . The addition of La(OTf)<sub>3</sub> caused the increasing of polymerization rate with the trend that the more La(OTf)<sub>3</sub> was added, the faster polymerization was observed. The  $k_{app}$  was enhanced to  $(1.64 \pm 0.03) \times 10^{-3}$ ,  $(3.06 \pm 0.09) \times 10^{-3}$  and  $(6.78 \pm 0.16) \times 10^{-3} \text{ min}^{-1}$ , when the [La(OTf)<sub>3</sub>]/[DMA] ratio was 5/600, 10/600 and 20/600, respectively.

The type of Lewis acid influenced not only the polymerization rate, but also the isotacticity of stereoblock copolymer, similar to the trend observed in the DMA polymerization mediated by complex **IV**. With the same ratio of [Lewis acid]/[DMA] as 20/600, Sc(OTf)<sub>3</sub> that has the smallest ionic radius induced the slowest polymerization rate with  $k_{app}$  as  $(0.89 \pm 0.01) \times 10^{-3} \text{ min}^{-1}$ , and the lowest isotacticity with the contents of  $m_2$  and  $mm_2$  as 71% and 48% (Table S3, entry 2). Lewis acids with larger ionic radii than Sc<sup>3+</sup>, such as Lu(OTf)<sub>3</sub> and Y(OTf)<sub>3</sub>,<sup>7</sup> elevated the polymerization rates, thus the  $k_{app}$  as  $(2.64 \pm 0.20) \times 10^{-3}$  and  $(2.97 \pm 0.07) \times 10^{-3} \text{ min}^{-1}$ , respectively. Meanwhile, Lu(OTf)<sub>3</sub> and Y(OTf)<sub>3</sub> also improved the isotacticity, leading to the contents of  $m_2 = 85\%$ ,  $mm_2 = 73\%$ , and  $m_2 = 86\%$ ,  $mm_2 = 73\%$ , respectively (Table S3, entries 3-4).

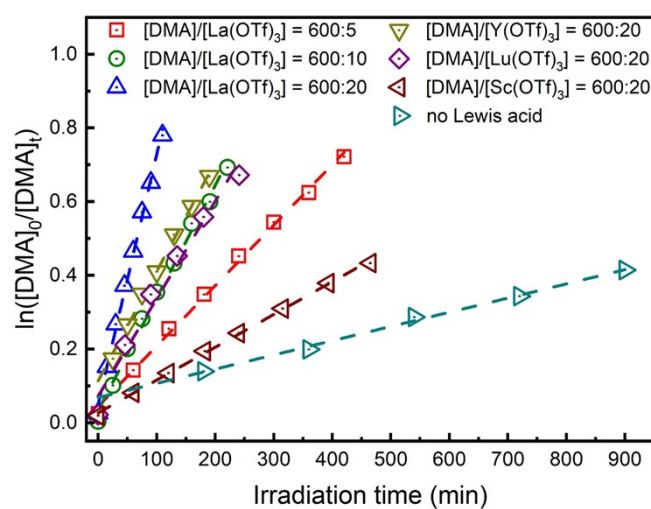

**Fig. S3** Kinetic studies of visible-light induced radical polymerization of DMA in mixed solvent of methanol and benzene (1:1, v/v) at 25 °C. (Cobalt mediator was complex **IV** in the absence of Lewis acid, and complex **V**<sub>46</sub> ( $M_{n, GPC} = 6500$ ,  $M_w/M_n = 1.23$ ,  $m = 50\%$ ) in the presence of Lewis acids.  $[DMA]_0 = 1.0 \text{ mol L}^{-1}$ ,  $[DMA]_0/[Co]_0 = 600:1$ , light intensity was  $3 \text{ mW cm}^{-2}$ )

## 6 GPC traces of stereoblock copolymers

After polymerization, all complexes  $V_n$  completely converted into stereoblock copolymers, based on GPC traces (Fig. S4 and S5), indicating high initiation efficiency.

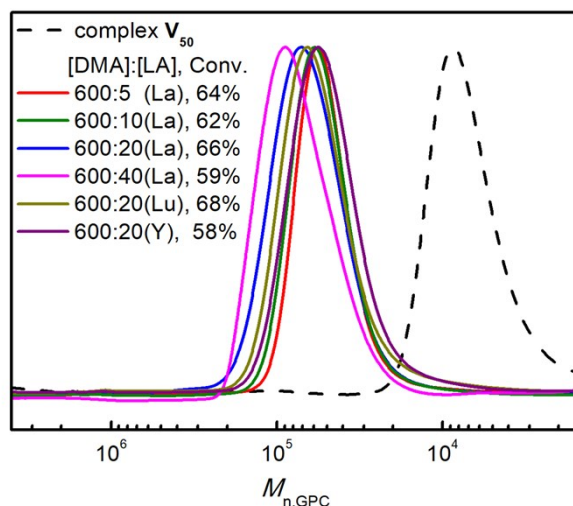

**Fig. S4** The GPC traces of stereoblock copolymers (Cobalt mediator was  $V_{50}$ :  $M_{n, GPC} = 6800$ ,  $M_w/M_n = 1.21$ ,  $m = 50\%$ .)

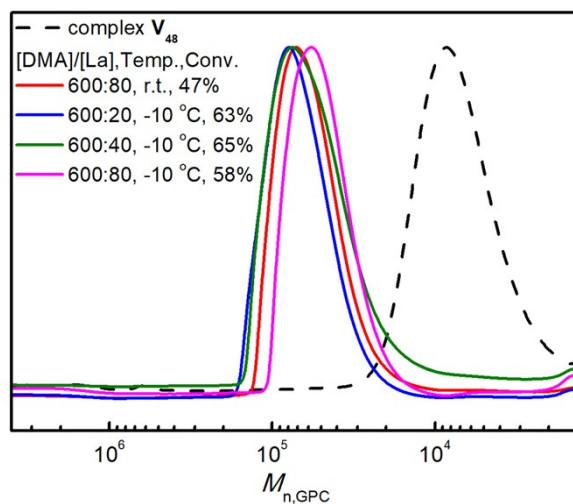

**Fig. S5** The GPC traces of stereoblock copolymers (Cobalt mediator was  $V_{48}$ :  $M_{n, GPC} = 6700$ ,  $M_w/M_n = 1.28$ ,  $m = 50\%$ .)

## 7 TGA analysis of PDMA

Under the nitrogen atmosphere, the decomposition temperature ( $T_d$ ) of atactic PDMA was 396 °C with 84% loss of weight (Fig. S6a), and  $T_d$  of bPDMA-91 was 392 °C with 86% loss of weight (Fig. S6b). Under the air atmosphere,  $T_d$  of atactic PDMA was 373 °C with 94% loss of weight (Fig. S6c), and  $T_d$  of bPDMA-91 was 384 °C with 98% loss of weight (Fig. S6d). Therefore, PDMA was thermally stable when temperature was lower than 300 °C, under both nitrogen and air atmosphere.



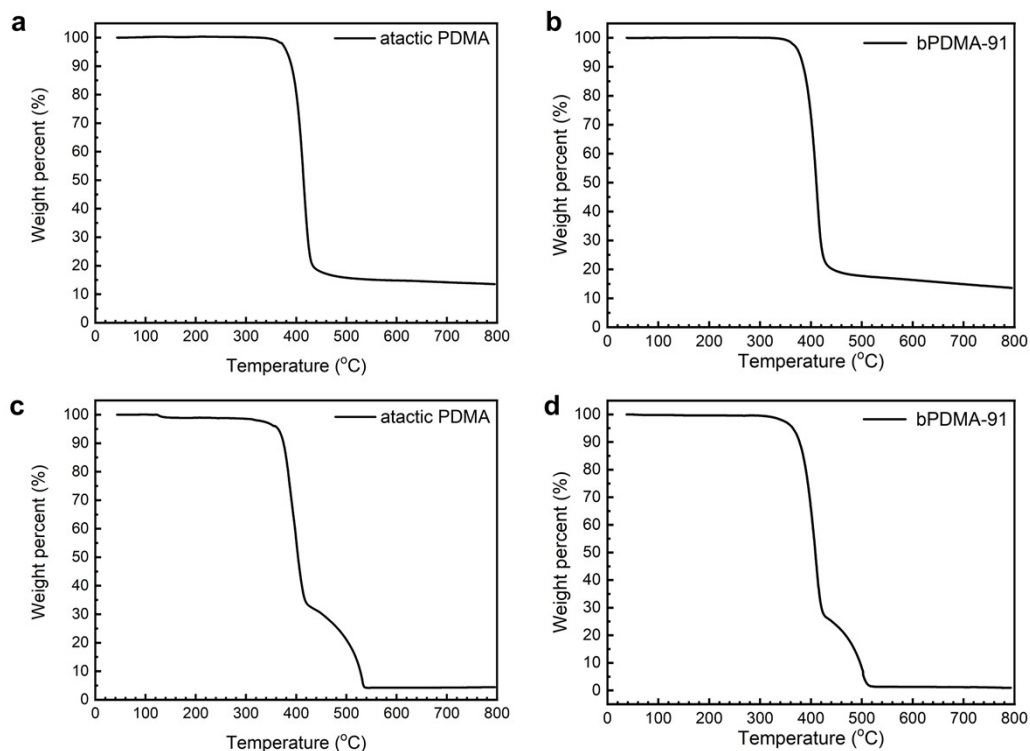

**Fig. S6** TGA curves of PDMA. **a)** and **b)** under the nitrogen atmosphere, **c)** and **d)** under the air atmosphere. **a)** and **c)** atactic PDMA, **b)** and **d)** bPDMA-91.

## 8 DSC analysis of stereoblock copolymers

If fixing the degree of polymerization (DP) of atactic block, and the tacticity of isotactic block, the stereoblock copolymers with low molecular weight and middle molecular weight both underwent cold crystallization with similar  $T_c$  and  $T_m$  (Fig. S7).

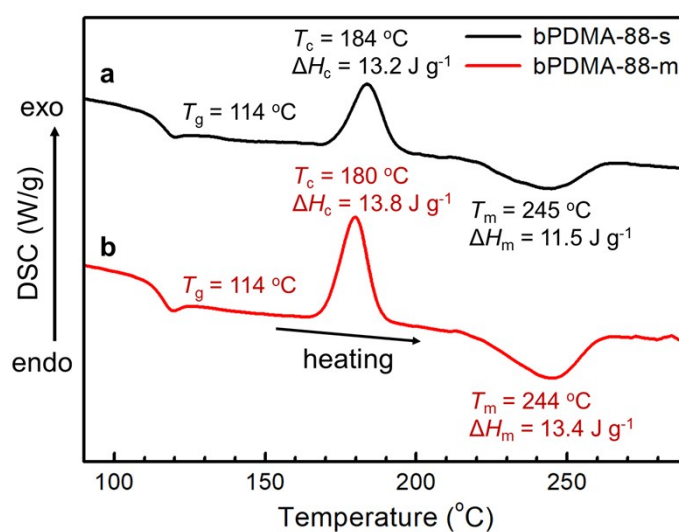

**Fig. S7** DSC thermograms of stereoblock copolymers. **a)** bPDMA-88-s, **b)** bPDMA-88-m.

When  $m_2$  content of stereoblock copolymer was less than 88%, neither crystallization nor melting peaks could be observed in DSC thermogram, even the heating and cooling rates were as low as  $2.5\text{ }^{\circ}\text{C min}^{-1}$  (Fig. S8).

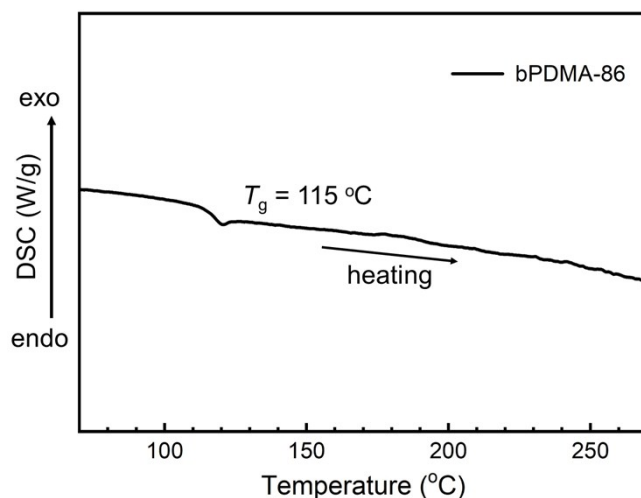

**Fig. S8** DSC thermogram of bPDMA-86 with the heating and cooling rates as  $2.5\text{ }^{\circ}\text{C min}^{-1}$ .

The DSC result could be influenced by the heating rate during the measurement, especially the crystallization process. The sample of bPDMA-88-l showed the higher  $T_c$  as  $201\text{ }^{\circ}\text{C}$ , and remarkably lower enthalpies of crystallization ( $\Delta H_c$ ) and melting ( $\Delta H_m$ ) as less than  $3\text{ J g}^{-1}$  when the heating rate was  $10\text{ }^{\circ}\text{C min}^{-1}$ . If the heating rate was further raised to  $20\text{ }^{\circ}\text{C min}^{-1}$ , the crystallization and melting peaks both disappeared in DSC thermogram (Fig. S9).

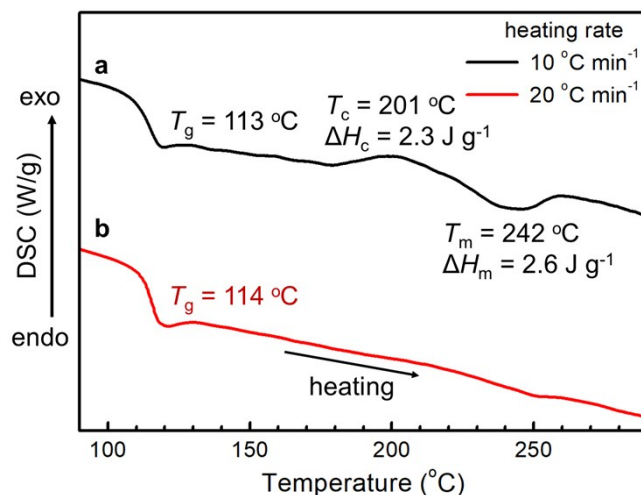

**Fig. S9** DSC thermograms of stereoblock copolymer of bPDMA-88-l with different heating and cooling rates. **a)**  $10\text{ }^{\circ}\text{C min}^{-1}$ , **b)**  $20\text{ }^{\circ}\text{C min}^{-1}$ .

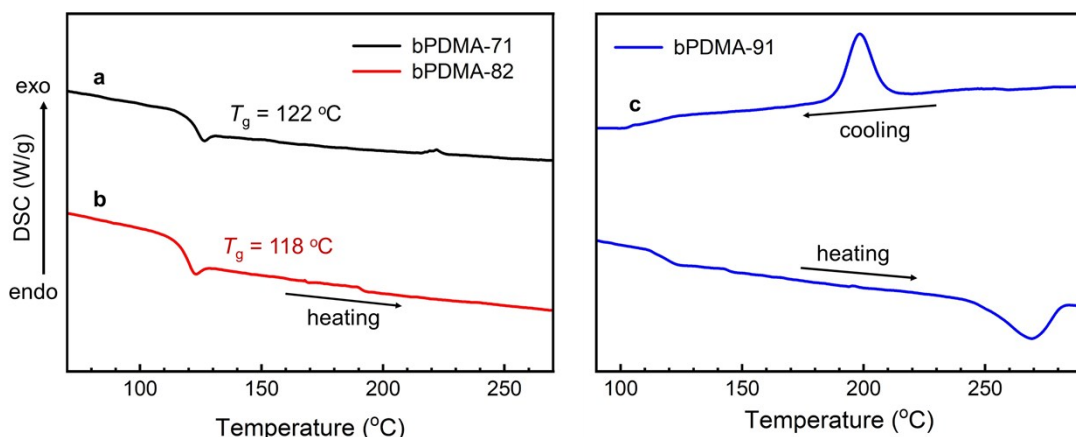

**Fig. S10** DSC thermograms of stereoblock copolymers. **a)** bPDMA-71, **b)** bPDMA-82, **c)** bPDMA-91.

## 9 DSC analysis of isotactic homopolymers

**Table S4** Thermal properties of isotactic homopolymers synthesized by stereospecific visible-light induced polymerization of DMA mediated by complex **IV**<sup>a</sup>

| Entry | Polymer  | $M_{n,GPC}^b$<br>(g mol <sup>-1</sup> ) | $M_w/M_n^b$       | $m^c$<br>(%) | $mm^c$<br>(%) | $T_g$<br>(°C) | $T_c$<br>(°C)    | $\Delta H_c$<br>(J g <sup>-1</sup> ) | $T_m$<br>(°C) | $\Delta H_m$<br>(J g <sup>-1</sup> ) |
|-------|----------|-----------------------------------------|-------------------|--------------|---------------|---------------|------------------|--------------------------------------|---------------|--------------------------------------|
| 1     | hPDMA-65 | 33200                                   | 1.33              | 65           | 41            | 123           | -                | -                                    | -             | -                                    |
| 2     | hPDMA-83 | 51400                                   | 1.43              | 83           | 68            | 115           | -                | -                                    | -             | -                                    |
| 3     | hPDMA-86 | 50700                                   | 1.46              | 86           | 72            | 115           | -                | -                                    | -             | -                                    |
| 4     | hPDMA-88 | 63600                                   | 1.72              | 88           | 78            | 114           | 179 <sup>d</sup> | 14.6 <sup>d</sup>                    | 243           | 11.9                                 |
| 5     | hPDMA-89 | 136900 <sup>e</sup>                     | 1.85 <sup>e</sup> | 89           | 79            | 116           | 179 <sup>f</sup> | 15.8 <sup>f</sup>                    | 254           | 13.8                                 |
| 6     | hPDMA-91 | 153500 <sup>e</sup>                     | 1.67 <sup>e</sup> | 91           | 83            | 116           | 190 <sup>f</sup> | 16.5 <sup>f</sup>                    | 267           | 15.5                                 |

<sup>a</sup> The heating and cooling rates of DSC measurement were both 5 °C min<sup>-1</sup>. <sup>b</sup> Determined using GPC in DMF calibrated against the PMMA standard. <sup>c</sup> Determined based on <sup>1</sup>H NMR spectra. <sup>d</sup> Observed in heating process. <sup>e</sup> Determined using GPC in CHCl<sub>3</sub> calibrated against the PMMA standard. <sup>f</sup> Observed in cooling process.

The isotactic homopolymers synthesized *via* the mediation of complex **IV** showed a decreasing of  $T_g$  from 123 °C to 114 °C when  $m$  content increased from 65% to 88% (Table S4, entries 1-4). Similar with stereoblock copolymer, isotactic homopolymer also transformed to crystalline polymer when the contents of  $m$  and  $mm$  approached to 88% and 78% (Table S4, entry 4, and Fig. S11c). In addition, when heating rate of DSC measurement was decreased from 5 °C min<sup>-1</sup> to 2.5 °C min<sup>-1</sup>, there were also no crystallization or melting peaks observed for hPDMA-86 (Fig. S12). Different to the stereoblock copolymer of bPDMA-89, isotactic homopolymer of hPDMA-89 whose  $m$  content was also 89% went through melt crystallization rather than cold crystallization with higher  $T_c$  as 179 °C and similar  $T_m$  as 254 °C (Table S4, entry 5, and Fig. S11d). The isotactic homopolymer of hPDMA-91, which had the higher  $m$  and  $mm$  contents as 91% and 83%, demonstrated the increased  $T_c$  as 190 °C,  $\Delta H_c$  as 16.5 J g<sup>-1</sup>,  $T_m$  as 267 °C, and  $\Delta H_m$  as 15.5 J g<sup>-1</sup> (Table S4, entry 6, and Fig. S11e).

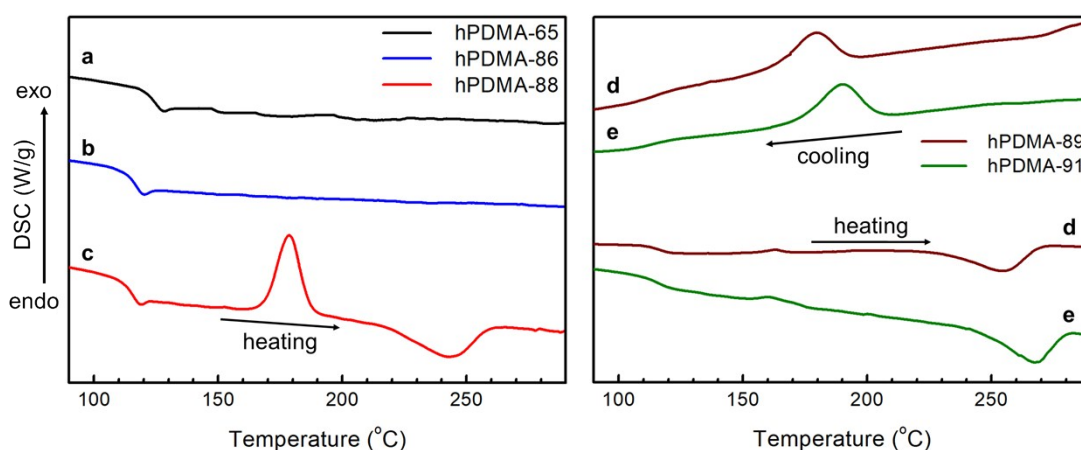

**Fig. S11** DSC thermograms of isotactic homopolymers. **a)** hPDMA-65, **b)** hPDMA-86, **c)** hPDMA-88, **d)** hPDMA-89, **e)** hPDMA-91.

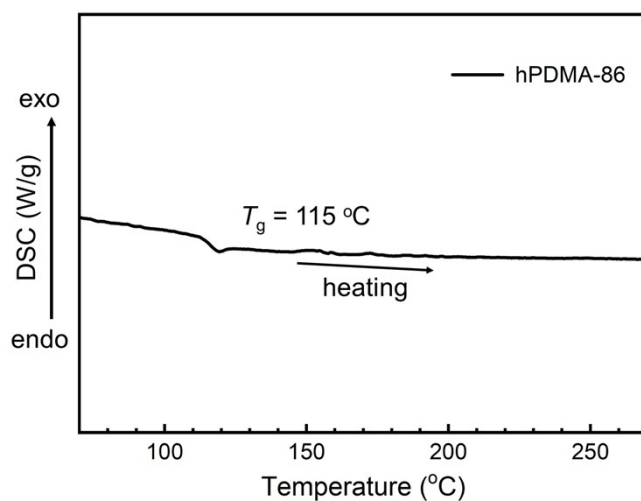

**Fig. S12** DSC thermogram of hPDMA-86 with the heating and cooling rates as 2.5 °C min<sup>-1</sup>.

## 10 PXRD plots of isotactic homopolymers

Similar with stereoblock copolymers, the crystalline isotactic homopolymers also exhibited sharp peaks ( $d$  spacing: 0.78 and 0.50 nm) in powder X-ray diffraction (PXRD) plots after annealing treatment (Fig. S13), which was consistent with isotactic PDMA synthesized by coordination polymerization.<sup>8</sup>

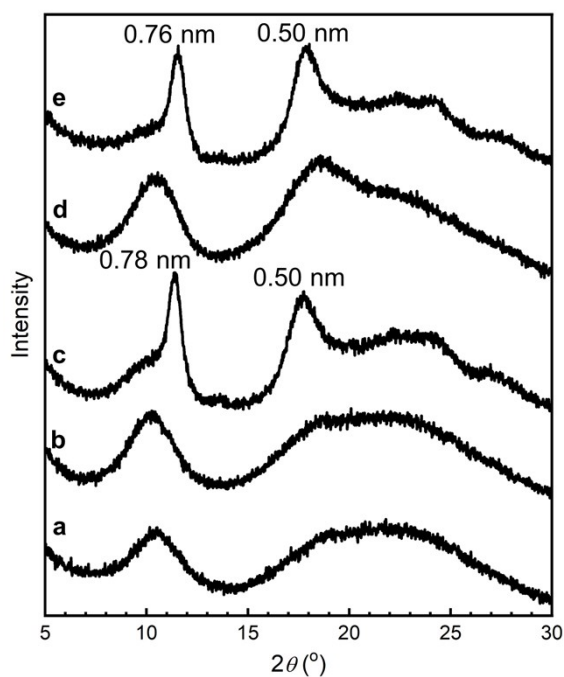

**Fig. S13** PXRD plots of isotactic homopolymers. **a)** hPDMA-86, **b)** hPDMA-88, **c)** hPDMA-88 annealed at 170 °C for 85 h, **d)** hPDMA-91, **e)** hPDMA-91 annealed at 180 °C for 84 h.

## 11 $^1\text{H}$ NMR spectra of ligands and organocobalt complexes

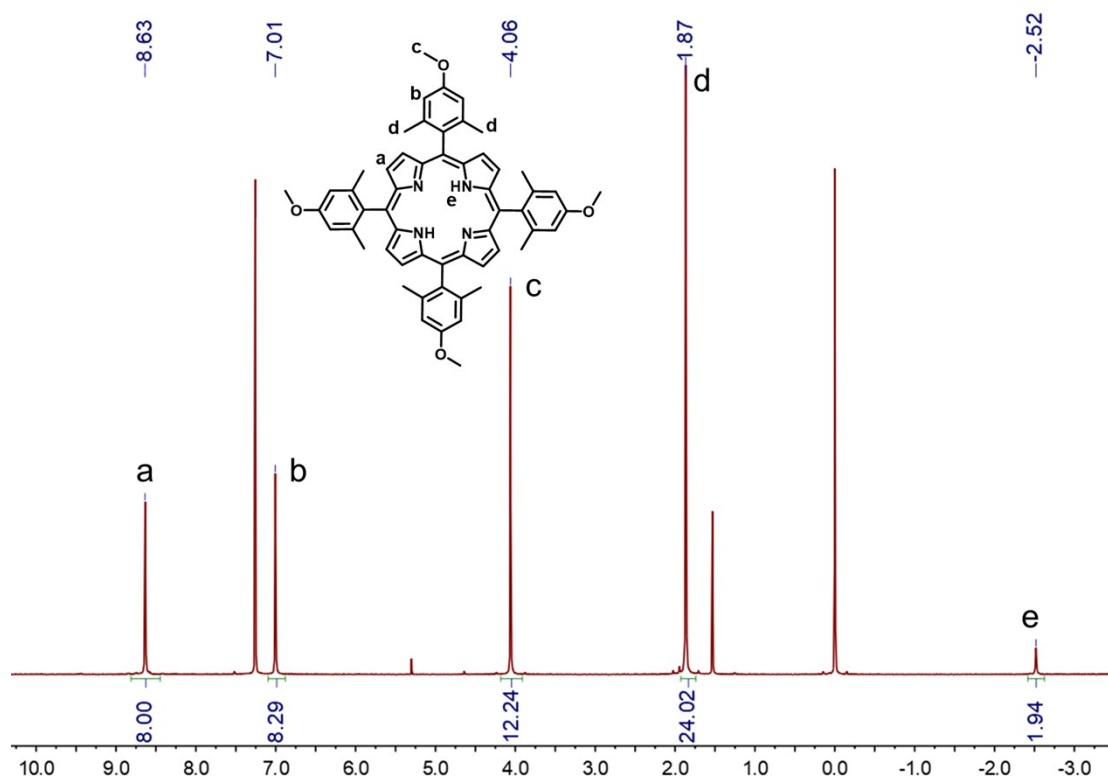

**Fig. S14**  $^1\text{H}$  NMR spectrum (400 MHz,  $\text{CDCl}_3$ ) of  $(\text{TDMAP})\text{H}_2$

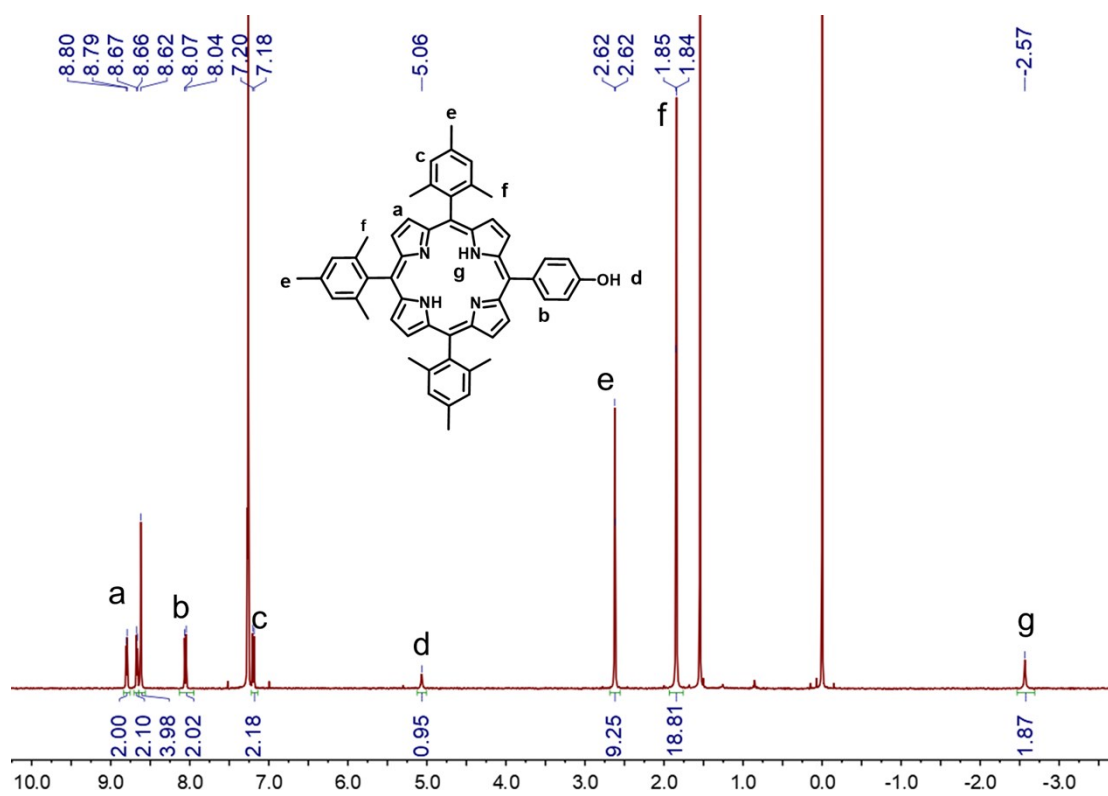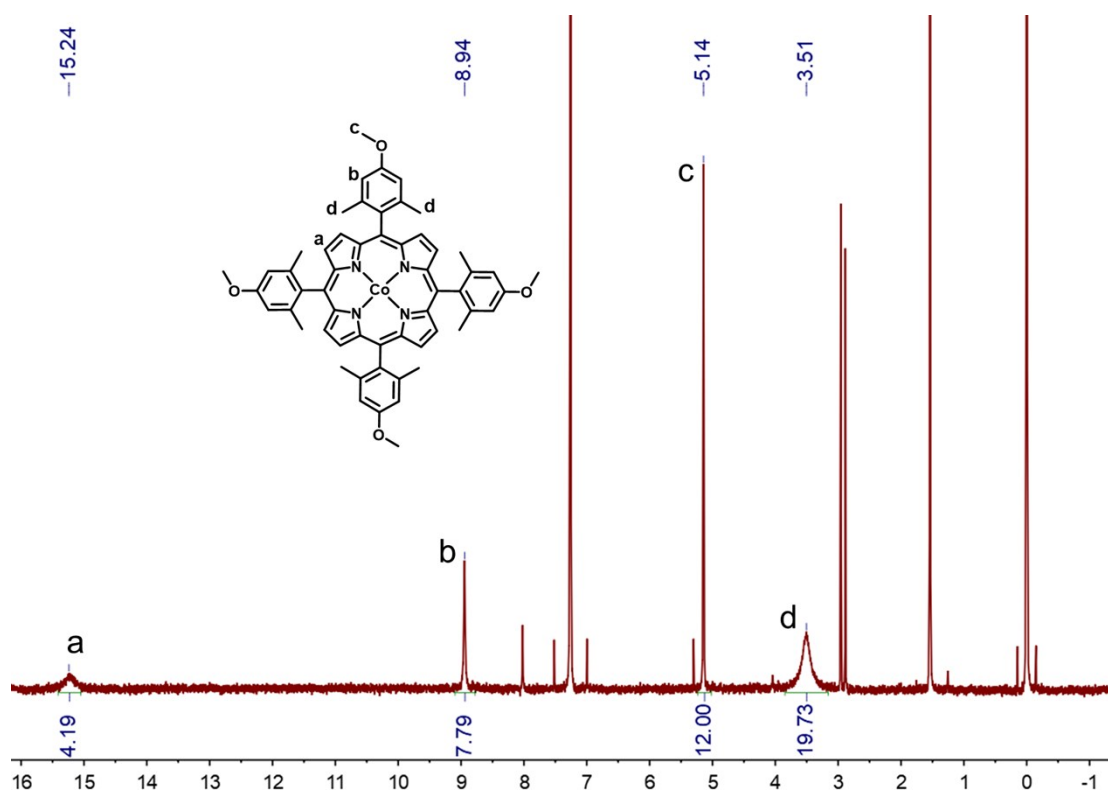

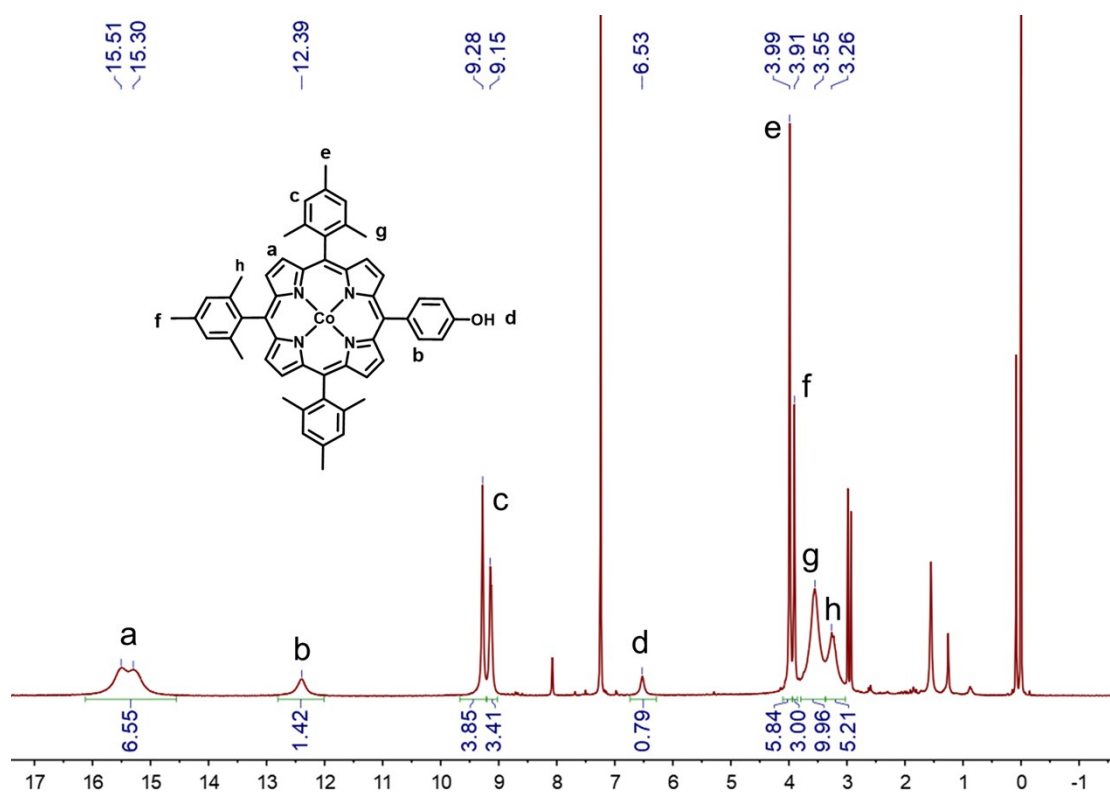

**Fig. S17** <sup>1</sup>H NMR spectrum (400 MHz, CDCl<sub>3</sub>) of (TMP-OH)Co<sup>II</sup>

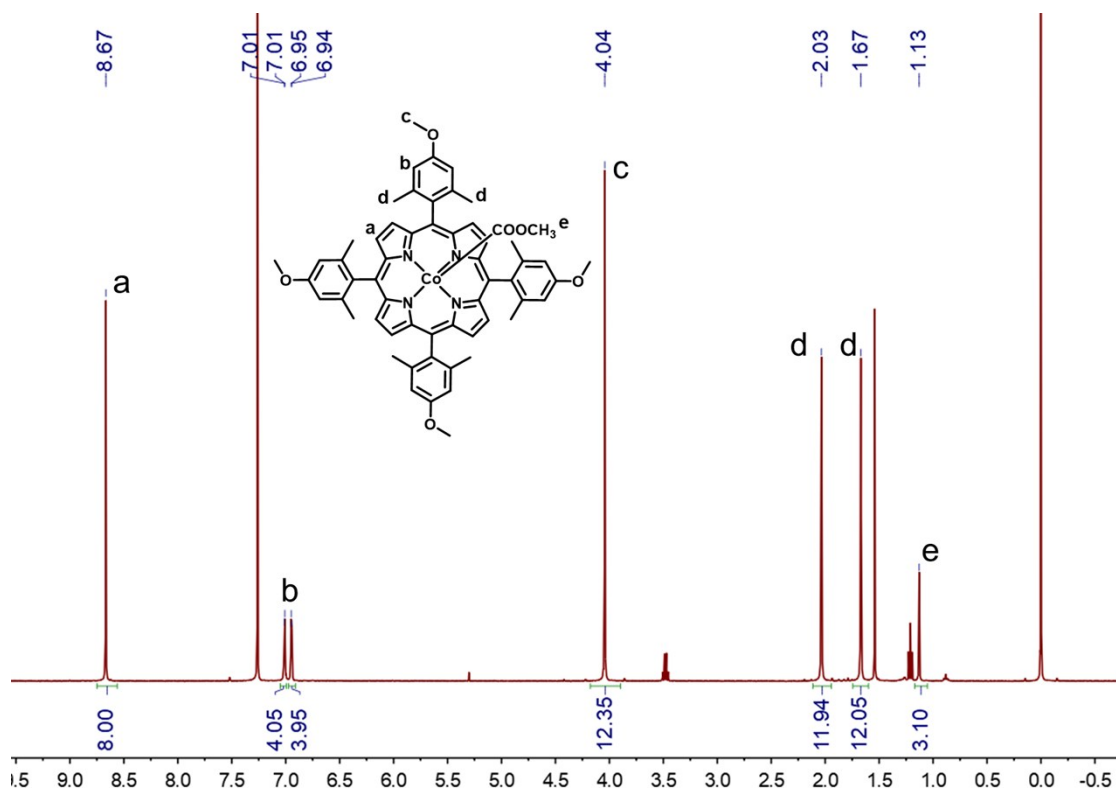

**Fig. S18** <sup>1</sup>H NMR spectrum (400 MHz, CDCl<sub>3</sub>) of (TDMAP)CoCO<sub>2</sub>CH<sub>3</sub> (III)

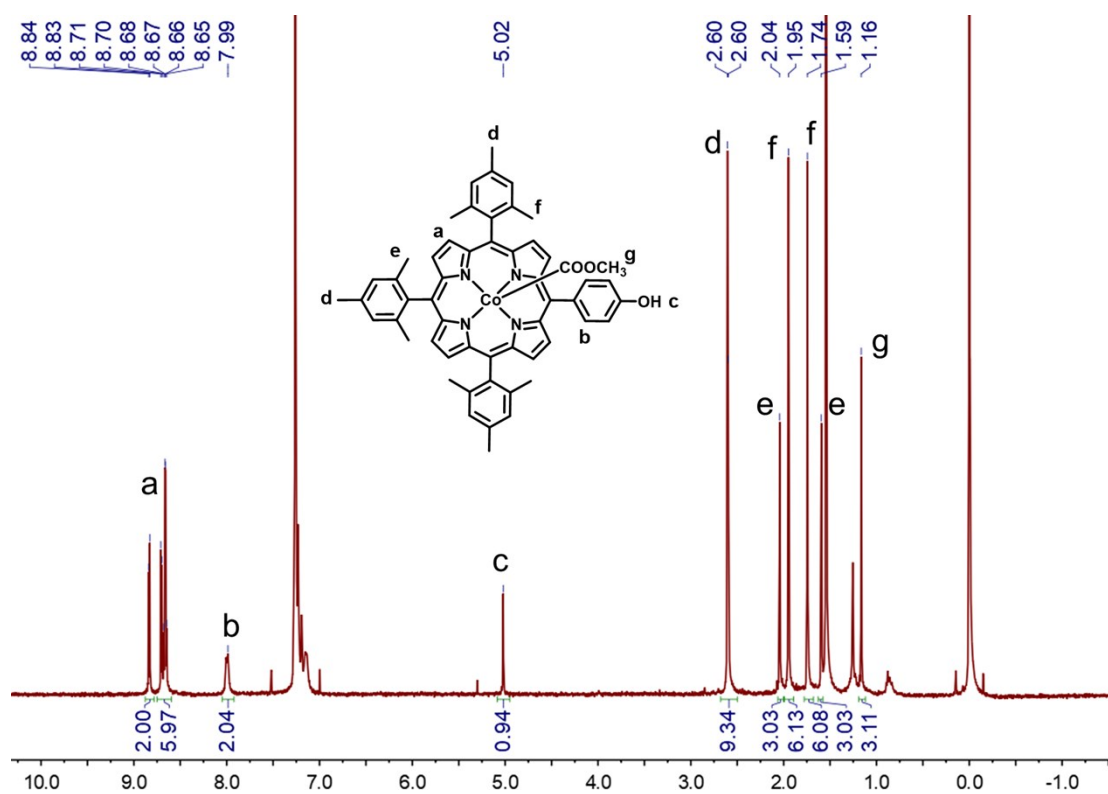

**Fig. S19** <sup>1</sup>H NMR spectrum (400 MHz, CDCl<sub>3</sub>) of (TMP-OH)CoCO<sub>2</sub>CH<sub>3</sub> (**IV**)

## References

- 1 Y. Zhao, M. Yu, S. Zhang, Z. Wu, Y. Liu, C.-H. Peng and X. Fu, *Chem. Sci.*, 2015, **6**, 2979–2988.
- 2 Y. Zhao, M. Yu, S. Zhang, Y. Liu and X. Fu, *Macromolecules*, 2014, **47**, 6238–6245.
- 3 A. D. Adler, J. D. Finarelli, F. R. Longo, J. Goldmacher, J. Assour and L. Korsakoff, *J. Org. Chem.*, 1966, **32**, 476.
- 4 M. Góngora-Benítez, L. Mendive-Tapia, I. Ramos-Tomillero, A. C. Breman, J. Tulla-Puche and F. Albericio, *Org. Lett.*, 2012, **14**, 5472–5475.
- 5 Y. Zhao, H. Dong, Y. Li and X. Fu, *Chem. Commun.*, 2012, **48**, 3506–3508.
- 6 H. Lu, W. I. Dzik, X. Xu, L. Wojtas, B. de Bruin and X. P. Zhang, *J. Am. Chem. Soc.*, 2011, **133**, 8518–8521.
- 7 P. W. Atkins, T. L. Overton, J. P. Rourke, M. T. Weller, F. A. Armstrong and M. Hagerman, *Inorganic Chemistry*, Oxford University Press, New York, Fifth Edition., 2010.
- 8 W. R. Mariott and E. Y.-X. Chen, *Macromolecules*, 2004, **37**, 4741–4743.
